# Supplementary material for: Preparation of high-quality lithium sulfide by reducing lithium sulfate with hydrogen: a green and cost-effective method
Source: Royal Society of Chemistry journal article supplement (doi:10.1039/d4gc01017e), 2024-01-01
Supplement: d4gc01017e1.pdf [file d4gc01017e1.pdf]

## Supplementary Information

# Preparation of high-quality lithium sulfide by reducing lithium sulfate with hydrogen: a green and cost-effective method

Yutao Yang, Rongzheng Tian, Hongzhou Zhang, Zhenyu Wang, Yongan Yang,  
Lianqi Zhang, Dawei Song

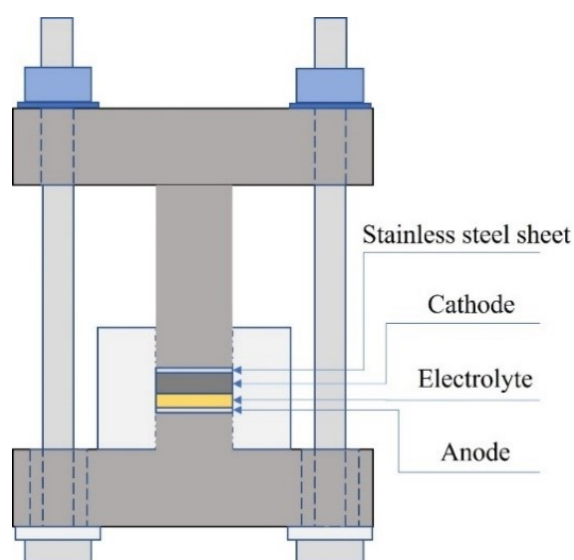

Fig. S1. Structure diagram of the ASSLB in this work.

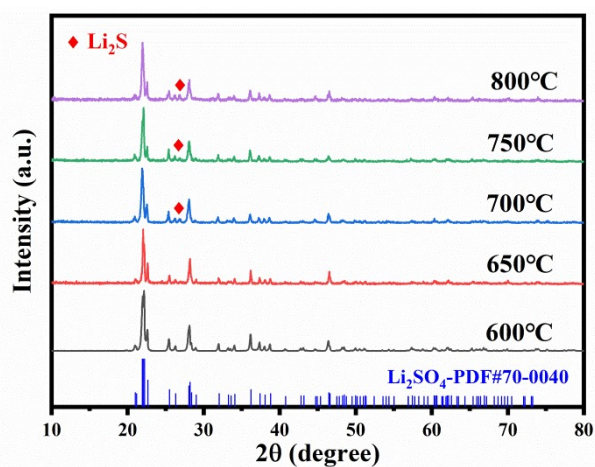

Fig. S2. XRD patterns of calcined products at different temperature.

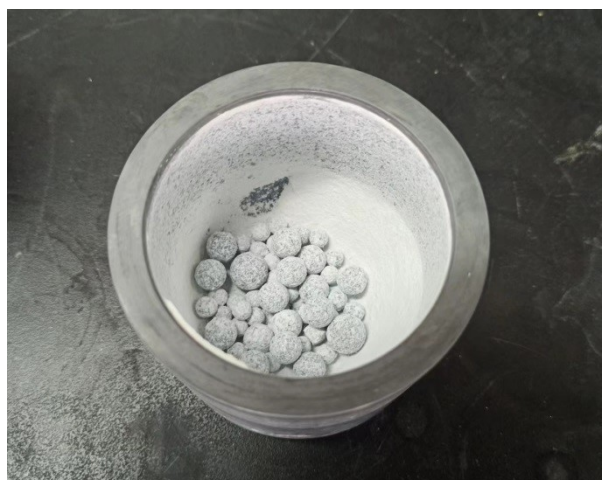

**Fig. S3.** Photograph of low ball milling efficiency caused by  $\text{Li}_2\text{SO}_4$  sticky wall (ball spinning over material) in dry ball milling.

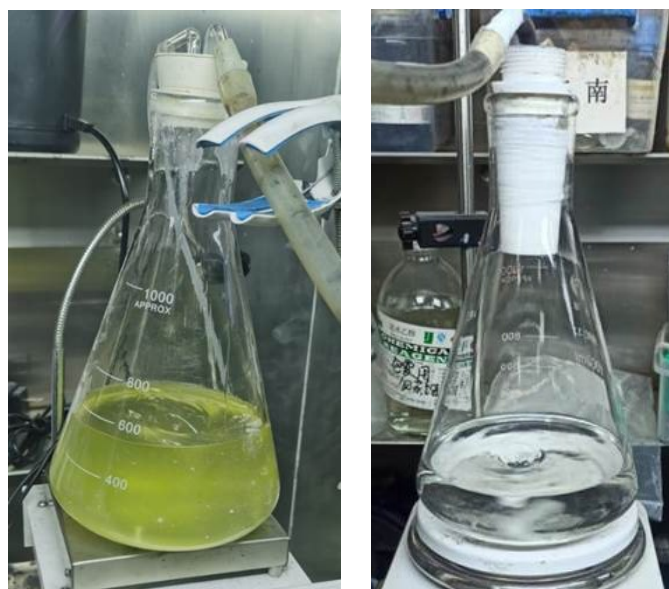

**Fig. S4.** Color comparison of products of carbothermal reduction (left) and  $\text{H}_2$  reduction (right) dissolved in anhydrous ethanol.

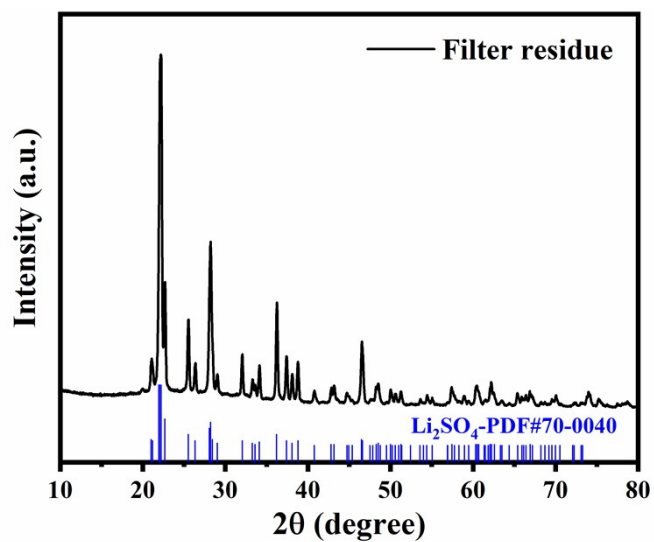

Fig. S5 XRD pattern of filter residue after purification of calcined products.

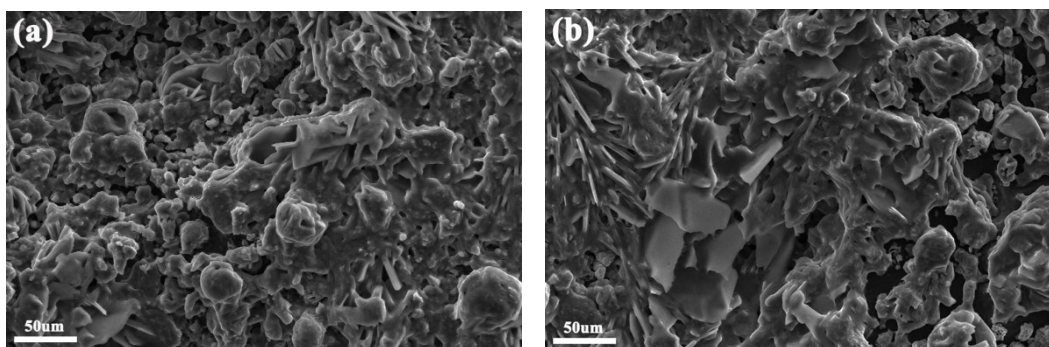

Fig. S6 SEM images of (a) N-Li<sub>2</sub>S and (b) H-Li<sub>2</sub>S.

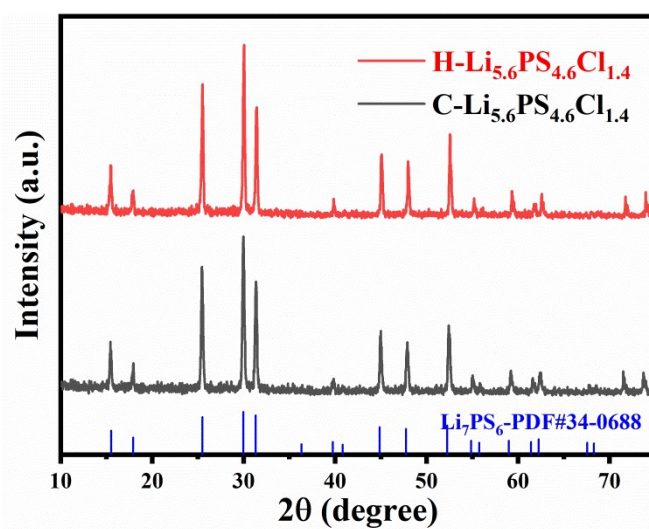

Fig. S7 XRD patterns of H-Li<sub>5.6</sub>PS<sub>4.6</sub>Cl<sub>1.4</sub> and C-Li<sub>5.6</sub>PS<sub>4.6</sub>Cl<sub>1.4</sub>.

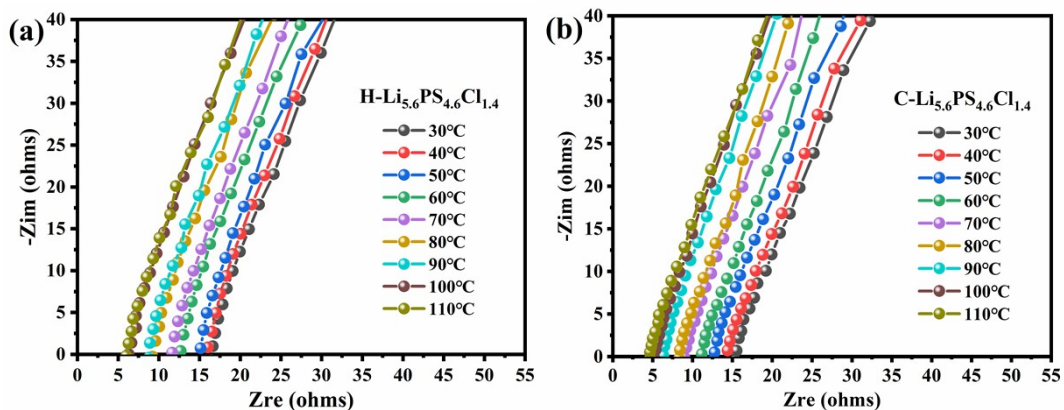

Fig. S8 Nyquist plots of (a) H-Li<sub>5.6</sub>PS<sub>4.6</sub>Cl<sub>1.4</sub> and (b) C-Li<sub>5.6</sub>PS<sub>4.6</sub>Cl<sub>1.4</sub> at different temperature.

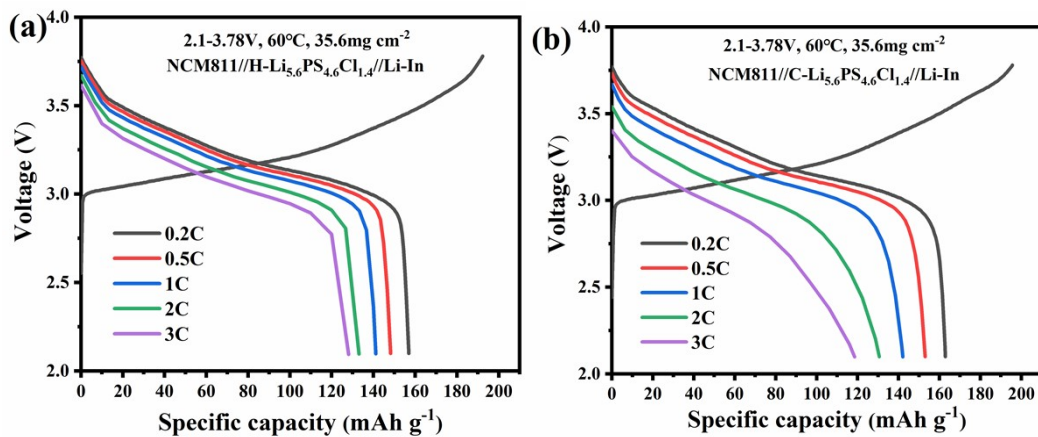

Fig. S9 Rate performance discharge capacity comparison chart of (a) H-Li<sub>5.6</sub>PS<sub>4.6</sub>Cl<sub>1.4</sub> and (b) C-Li<sub>5.6</sub>PS<sub>4.6</sub>Cl<sub>1.4</sub>.

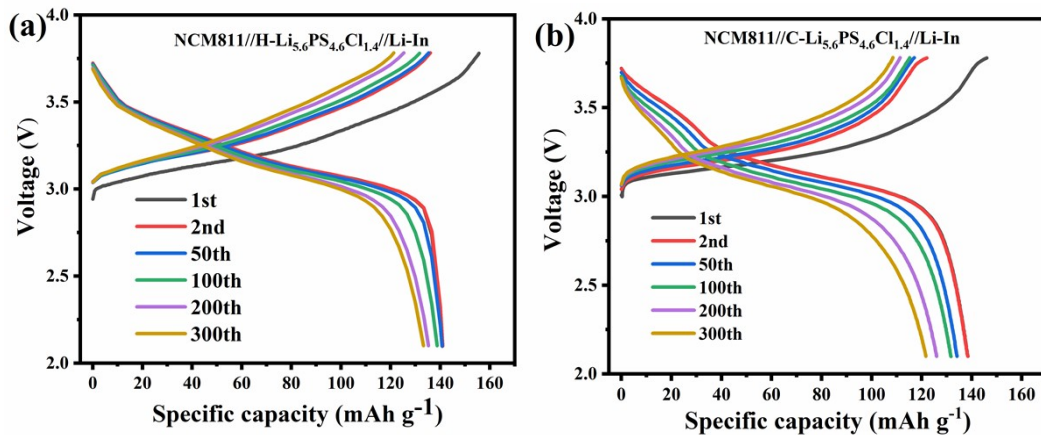

Fig. S10 Comparison of discharge capacities of (a) H-Li<sub>5.6</sub>PS<sub>4.6</sub>Cl<sub>1.4</sub> and (b) C-Li<sub>5.6</sub>PS<sub>4.6</sub>Cl<sub>1.4</sub> with different cycles.

**Table S1** C-Li<sub>2</sub>S determination of elements (ICP-OES method).

|                         |        |        |                        |                         |                        |        |
|-------------------------|--------|--------|------------------------|-------------------------|------------------------|--------|
| Elements                | Ag     | Al     | As                     | B                       | Ba                     | Be     |
| Element content (mg/kg) | 0.6453 | 17.59  | ND                     | 8.728                   | 6.536                  | ND     |
| Elements                | Bi     | Ca     | Cd                     | Co                      | Cr                     | Cu     |
| Element content (mg/kg) | 4.794  | 3.553  | ND                     | 3.181                   | ND                     | 25.34  |
| Elements                | Fe     | K      | Li                     | Mg                      | Mn                     | Mo     |
| Element content (mg/kg) | ND     | 0.6862 | 3.065 ×10 <sup>5</sup> | 7.548                   | 15.99                  | 0.3532 |
| Elements                | Na     | Ni     | P                      | Pb                      | S                      | Sb     |
| Element content (mg/kg) | 693.1  | 3.472  | 16.14                  | ND                      | 7.742 ×10 <sup>5</sup> | ND     |
| Elements                | Se     | Si     | Sn                     | Sr                      | Ti                     | Tl     |
| Element content (mg/kg) | ND     | 21.64  | ND                     | 3.803 ×10 <sup>-2</sup> | 0.8224                 | 0.1799 |
| Elements                | V      | Zn     | Zr                     |                         |                        |        |
| Element content (mg/kg) | 2.217  | 5.476  | 0.1734                 |                         |                        |        |

**Table S2** H-Li<sub>2</sub>S determination of elements (ICP-OES method).

|                         |        |        |                        |        |                        |        |
|-------------------------|--------|--------|------------------------|--------|------------------------|--------|
| Elements                | Ag     | Al     | As                     | B      | Ba                     | Be     |
| Element content (mg/kg) | 0.5678 | 20.789 | ND                     | 4.578  | 8.984                  | 5.554  |
| Elements                | Bi     | Ca     | Cd                     | Co     | Cr                     | Cu     |
| Element content (mg/kg) | ND     | 4.895  | ND                     | 15.489 | ND                     | 40.549 |
| Elements                | Fe     | K      | Li                     | Mg     | Mn                     | Mo     |
| Element content (mg/kg) | 60.145 | 0.895  | 3.066 ×10 <sup>5</sup> | 15.786 | 8.685                  | 2.2548 |
| Elements                | Na     | Ni     | P                      | Pb     | S                      | Sb     |
| Element content (mg/kg) | 154.89 | 3.1456 | 20.458                 | ND     | 7.744 ×10 <sup>5</sup> | ND     |
| Elements                | Se     | Si     | Sn                     | Sr     | Ti                     | Tl     |
| Element content (mg/kg) | ND     | 40.578 | ND                     | 0.458  | 0.4789                 | 0.1458 |
| Elements                | V      | Zn     | Zr                     |        |                        |        |
| Element content (mg/kg) | 5.1489 | 6.4581 | 0.1789                 |        |                        |        |
